# Supplementary material for: Low temperature preparation of TiO2 nanoparticle chains without hydrothermal treatment for highly efficient dye-sensitized solar cells
Source: Royal Society of Chemistry journal article supplement (doi:10.1039/c4ta06679k), 2015-01-01
Supplement: c4ta06679k1.pdf [file c4ta06679k1.pdf]

## Supplementary Information

### Low Temperature Preparation of TiO<sub>2</sub> Nanoparticle Chains without Hydrothermal Treatment for Highly Efficient Dye-Sensitized Solar Cells

Yan Cui, Lu Zhang, Kai Lv, Gang Zhou, and Zhong-Sheng Wang\*

Department of Chemistry, Collaborative Innovation Center of Chemistry for Energy Materials,  
Department of Macromolecular Science, State Key Laboratory of Molecular Engineering of  
Polymers, Lab of Advanced Materials, Fudan University, 2205 Songhu Road, Shanghai 200438,  
P. R. China

E-mail: zs.wang@fudan.edu.cn

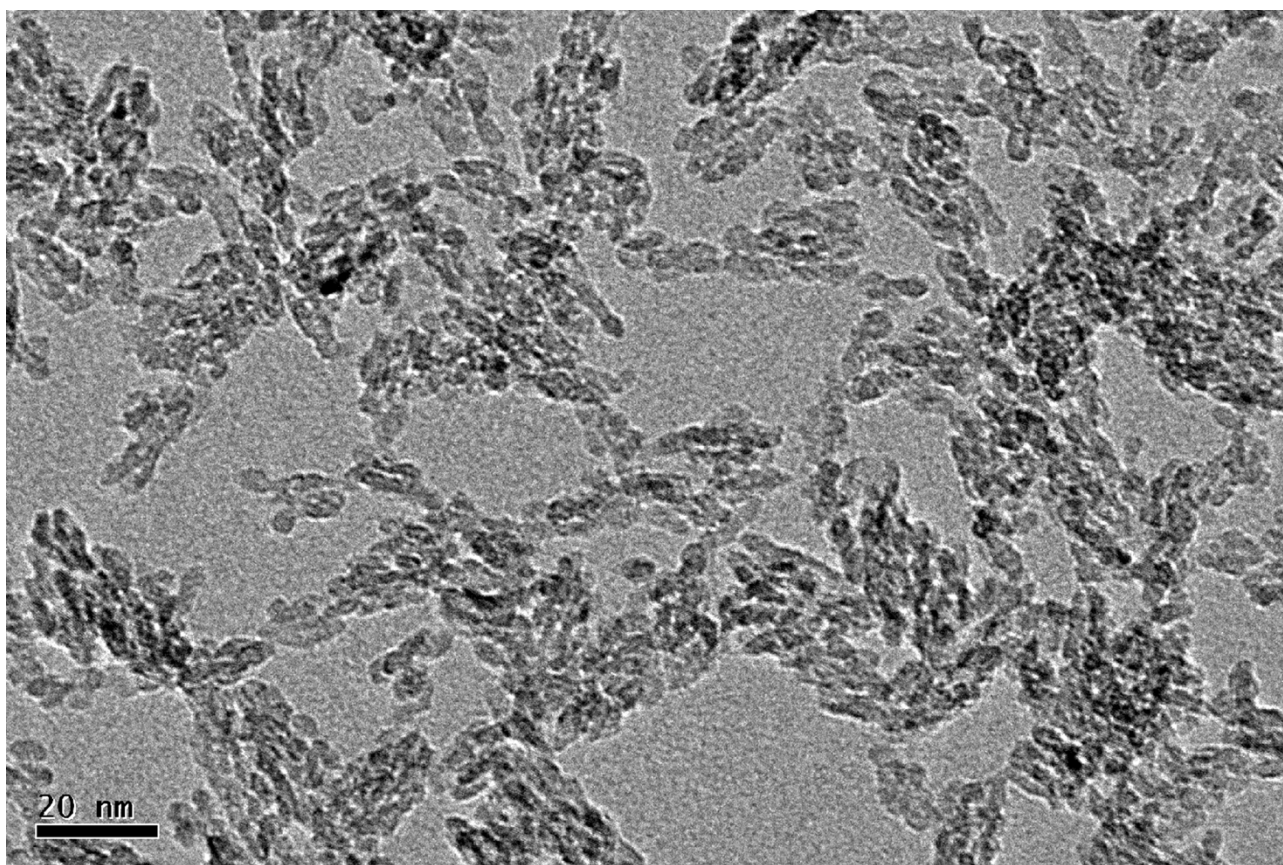

**Figure S1.** Magnified TEM image of the as prepared NP chains.

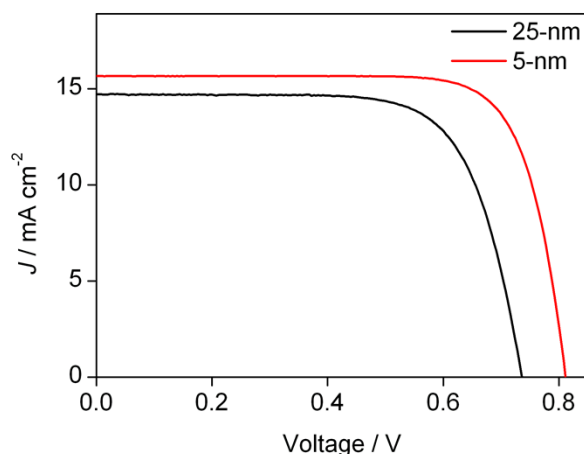

**Figure S2.** Current-voltage curves for the 5-nm NP chains and 25-nm separated NPs. The film thickness is 15.5  $\mu\text{m}$  for NP chains and 17.2  $\mu\text{m}$  for 25-nm NPs. The dye and electrolyte are same as detailed in the Experimental Section.

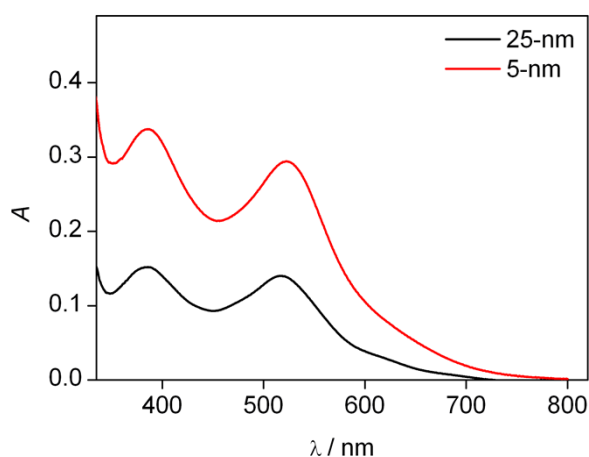

**Figure S3.** UV-vis absorption spectra for dye-loaded 5-nm NP chains and 25-nm separated NPs

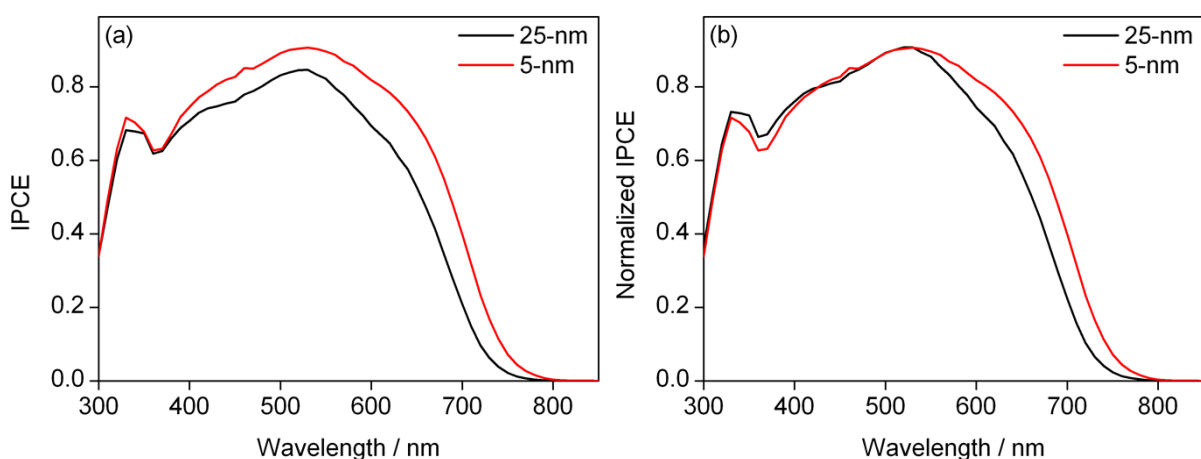

**Figure S4.** Comparison of IPCE (a) and normalized IPCE (b) spectra for DSSCs with 5-nm NP chains or 25-nm NPs
